# Supplementary material for: Ascites and resistance to immune checkpoint inhibition in dMMR/MSI-H metastatic colorectal and gastric cancers
Source: PubMed Central journal article supplement — J Immunother Cancer. 2022 Feb 2;10(2):e004001. doi: 10.1136/jitc-2021-004001 (PMC8811606; doi:10.1136/jitc-2021-004001), 2022-02-02
Supplement: jitc-2021-004001supp001.pdf [file jitc-2021-004001supp001.pdf]

**Supplemental Table 1. Centers' list and contribution to cohort 1 (dMMR/MSI-H mCRC).**

| Center                                                                   | Patients included (N=502)<br>N (%) |
|--------------------------------------------------------------------------|------------------------------------|
| Hôpital Saint-Antoine, Paris, France                                     | 171 (34.0)                         |
| Istituto Oncologico Veneto IOV-IRCCS, Padua, Italy                       | 89 (17.7)                          |
| University of Texas MD Anderson Cancer Center, Houston, Texas, USA       | 82 (16.3)                          |
| Fondazione IRCCS Istituto Nazionale dei Tumori, Milan, Italy             | 34 (6.8)                           |
| Vall d'Hebron Institute of Oncology (VHIO), Barcelona, Spain             | 30 (6.0)                           |
| University Hospital of Modena, Modena, Italy                             | 22 (4.4)                           |
| Candiolo Cancer Institute FPO-IRCCS, Candiolo, Italy                     | 20 (4.0)                           |
| Norris Comprehensive Cancer Center, Los Angeles, California, USA         | 20 (4.0)                           |
| City of Hope Comprehensive Cancer Center, Duarte, California, USA        | 17 (3.4)                           |
| Fondazione Policlinico Universitario Agostino Gemelli IRCCS, Rome, Italy | 9 (1.8)                            |
| European Institute of Oncology (IEO), Milan, Italy                       | 5 (1.0)                            |
| Azienda Ospedaliero-Universitaria Pisana, Pisa, Italy                    | 3 (0.6)                            |
