# Supplementary material for: Ascites and resistance to immune checkpoint inhibition in dMMR/MSI-H metastatic colorectal and gastric cancers
Source: PubMed Central journal article supplement — J Immunother Cancer. 2022 Feb 2;10(2):e004001. doi: 10.1136/jitc-2021-004001 (PMC8811606; doi:10.1136/jitc-2021-004001), 2022-02-02
Supplement: jitc-2021-004001supp002.pdf [file jitc-2021-004001supp002.pdf]

**Supplemental Table 2. Pairwise analysis of the clinico-pathological and treatment characteristics according to the presence metastatic peritoneal involvement with or without ascites in the developing set of patients with MSI-high/dMMR mCRC (Cohort 1).**

| Characteristics                | A - No peritoneal metastases (N=305)<br>N (%) | B - Peritoneal metastases without ascites (N=172)<br>N (%) | C - Peritoneal metastases with ascites (N=25)<br>N (%) | B vs A<br><i>p</i> * | C vs A<br><i>p</i> * | C vs B<br><i>p</i> * |
|--------------------------------|-----------------------------------------------|------------------------------------------------------------|--------------------------------------------------------|----------------------|----------------------|----------------------|
| <b>Sex</b>                     |                                               |                                                            |                                                        | 0.567                | 0.532                | 0.674                |
| Female                         | 135 (44.3)                                    | 81 (47.1)                                                  | 13 (52.0)                                              |                      |                      |                      |
| Male                           | 170 (55.7)                                    | 91 (52.9)                                                  | 12 (48.0)                                              |                      |                      |                      |
| <b>Age (years)</b>             |                                               |                                                            |                                                        | 0.323                | 0.468                | 0.236                |
| <70                            | 233 (76.4)                                    | 124 (72.1)                                                 | 21 (84.0)                                              |                      |                      |                      |
| ≥70                            | 72 (23.6)                                     | 48 (27.9)                                                  | 4 (16.0)                                               |                      |                      |                      |
| <b>ECOG PS</b>                 |                                               |                                                            |                                                        | 0.924                | <b>0.006</b>         | <b>0.009</b>         |
| 0                              | 149 (48.9)                                    | 83 (48.3)                                                  | 5 (20.0)                                               |                      |                      |                      |
| ≥1                             | 156 (51.1)                                    | 89 (51.7)                                                  | 20 (80.0)                                              |                      |                      |                      |
| <b>Primary tumor resection</b> |                                               |                                                            |                                                        | 0.084                | 0.796                | 0.762                |
| No                             | 62 (20.3)                                     | 24 (14.0)                                                  | 4 (16.0)                                               |                      |                      |                      |
| Yes                            | 243 (79.7)                                    | 148 (86.0)                                                 | 21 (84.0)                                              |                      |                      |                      |
| <b>Primary tumor sidedness</b> |                                               |                                                            |                                                        | <b>0.021</b>         | 0.197                | 0.813                |
| Left                           | 118 (38.7)                                    | 48 (27.9)                                                  | 6 (24.0)                                               |                      |                      |                      |
| Right                          | 187 (61.3)                                    | 124 (72.1)                                                 | 19 (76.0)                                              |                      |                      |                      |
| NA                             |                                               |                                                            |                                                        |                      |                      |                      |
| <b>RAS mutational status</b>   |                                               |                                                            |                                                        | 0.414                | <b>0.048</b>         | 0.107                |
| Wild-type                      | 186 (61.0)                                    | 110 (64.0)                                                 | 21 (84.0)                                              |                      |                      |                      |
| RAS mutated                    | 108 (35.4)                                    | 53 (30.8)                                                  | 4 (16.0)                                               |                      |                      |                      |
| NA                             | 11 (3.6)                                      | 9 (5.2)                                                    | 0 (0.0)                                                |                      |                      |                      |
| <b>BRAF mutational status</b>  |                                               |                                                            |                                                        | 0.321                | 0.056                | 0.166                |
| Wild-type                      | 221 (72.5)                                    | 116 (67.4)                                                 | 14 (56.0)                                              |                      |                      |                      |
| BRAF mutated                   | 73 (23.9)                                     | 48 (27.9)                                                  | 11 (44.0)                                              |                      |                      |                      |
| NA                             | 11 (3.6)                                      | 8 (4.67)                                                   | 0 (0.0)                                                |                      |                      |                      |
| <b>Synchronous metastases</b>  |                                               |                                                            |                                                        | 0.390                | 0.302                | 0.198                |
| No                             | 145 (47.5)                                    | 88 (51.2)                                                  | 9 (36.0)                                               |                      |                      |                      |
| Yes                            | 160 (52.5)                                    | 82 (47.6)                                                  | 16 (64.0)                                              |                      |                      |                      |
| NA                             | 0 (0.0)                                       | 2 (1.2)                                                    | 0 (0.0)                                                |                      |                      |                      |
| <b>Liver metastases</b>        |                                               |                                                            |                                                        | <b>&lt;0.001</b>     | 0.060                | 0.625                |
| No                             | 157 (51.5)                                    | 131 (76.2)                                                 | 18 (72.0)                                              |                      |                      |                      |
| Yes                            | 148 (48.5)                                    | 41 (23.8)                                                  | 7 (28.0)                                               |                      |                      |                      |
| <b>Lung metastases</b>         |                                               |                                                            |                                                        | <b>0.048</b>         | 0.437                | >0.999               |
| No                             | 241 (79.0)                                    | 149 (86.6)                                                 | 22 (88.0)                                              |                      |                      |                      |
| Yes                            | 64 (21.0)                                     | 23 (13.3)                                                  | 3 (12.0)                                               |                      |                      |                      |
| <b>Lymph nodal metastases</b>  |                                               |                                                            |                                                        | <b>&lt;0.001</b>     | 0.187                | 0.520                |
| No                             | 101 (33.1)                                    | 97 (56.4)                                                  | 12 (48.0)                                              |                      |                      |                      |
| Yes                            | 204 (66.9)                                    | 75 (43.6)                                                  | 13 (52.0)                                              |                      |                      |                      |
| <b>Bone metastases</b>         |                                               |                                                            |                                                        | 0.352                | 0.636                | 0.218                |
| No                             | 289 (94.8)                                    | 167 (97.1)                                                 | 23 (92.0)                                              |                      |                      |                      |
| Yes                            | 16 (5.2)                                      | 5 (2.9)                                                    | 2 (8.0)                                                |                      |                      |                      |

|                                                        |            |            |           |                  |              |       |
|--------------------------------------------------------|------------|------------|-----------|------------------|--------------|-------|
| <b>Number of metastatic sites</b>                      |            |            |           | <b>&lt;0.001</b> | <b>0.021</b> | 0.654 |
| 1                                                      | 162 (53.1) | 58 (33.7)  | 7 (28.0)  |                  |              |       |
| ≥2                                                     | 143 (46.9) | 114 (66.3) | 18 (72.0) |                  |              |       |
| <b>Prior systemic treatment for metastatic disease</b> |            |            |           | 0.281            | 0.128        | 0.380 |
| No                                                     | 65 (21.3)  | 29 (16.9)  | 2 (8.0)   |                  |              |       |
| Yes                                                    | 240 (78.7) | 143 (83.1) | 23 (92.0) |                  |              |       |
| <b>ICI regimen</b>                                     |            |            |           | <b>0.045</b>     | >0.999       | 0.279 |
| a-PD(L)-1                                              | 211 (69.2) | 103 (59.9) | 18 (72.0) |                  |              |       |
| a-PD-1 + a-CTLA-4                                      | 94 (30.8)  | 69 (40.1)  | 7 (28.0)  |                  |              |       |
| *Pairwise Fisher's exact test                          |            |            |           |                  |              |       |
