# Supplementary material for: Ascites and resistance to immune checkpoint inhibition in dMMR/MSI-H metastatic colorectal and gastric cancers
Source: PubMed Central journal article supplement — J Immunother Cancer. 2022 Feb 2;10(2):e004001. doi: 10.1136/jitc-2021-004001 (PMC8811606; doi:10.1136/jitc-2021-004001), 2022-02-02
Supplement: jitc-2021-004001supp003.pdf [file jitc-2021-004001supp003.pdf]

**Supplemental Table 3. Centers' list and contribution to cohort 2 (dMMR/MSI-H mGC).**

| <b>Center</b>                                                     | <b>Patients included (N=59)<br/>N (%)</b> |
|-------------------------------------------------------------------|-------------------------------------------|
| National Cancer Center Hospital East, Kashiwa, Japan              | 18 (30.5)                                 |
| Fondazione IRCCS Istituto Nazionale dei Tumori, Milan, Italy      | 13 (22.1)                                 |
| City of Hope Comprehensive Cancer Center, Duarte, California, USA | 10 (16.9)                                 |
| Massachusetts General Hospital, Boston, Massachusetts, USA        | 10 (16.9)                                 |
| Istituto Oncologico Veneto IOV-IRCCS, Padua, Italy                | 8 (13.6)                                  |
