# Supplementary material for: Ascites and resistance to immune checkpoint inhibition in dMMR/MSI-H metastatic colorectal and gastric cancers
Source: PubMed Central journal article supplement — J Immunother Cancer. 2022 Feb 2;10(2):e004001. doi: 10.1136/jitc-2021-004001 (PMC8811606; doi:10.1136/jitc-2021-004001), 2022-02-02

**Supplemental Figure 3.** Kaplan Meier curves for progression-free survival (PFS, panel A) and overall survival (OS, panel B) in the overall population of patients with dMMR/MSI-high mGC treated with immune checkpoint inhibitors (Cohort 2).

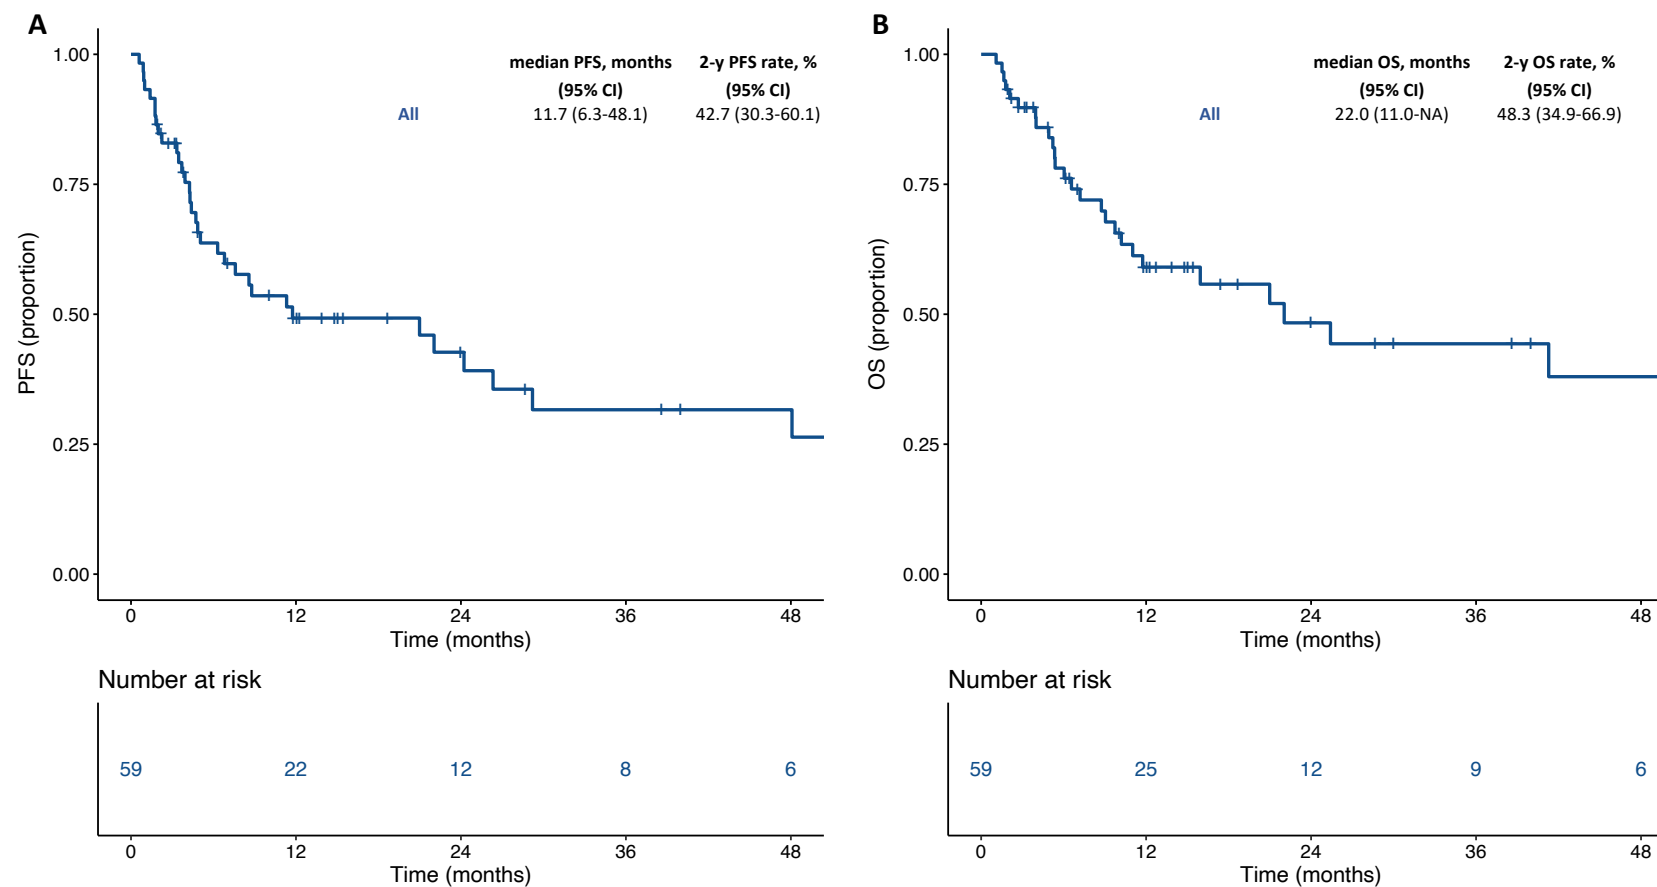

Supplement: jitc-2021-004001supp006.pdf [file jitc-2021-004001supp006.pdf]
